# Supplementary material
Source: MDPI journal article supplement (https://www.mdpi.com/2072-4292/9/11/1200)
Supplement: s1 [file s1]

## Supplementary Material

# A phenological approach to spectral differentiation of low-Arctic tundra vegetation communities, North Slope, Alaska

Alison L Beamish\*, Nicholas C Coops, Sabine Chabrillat and Birgit Heim

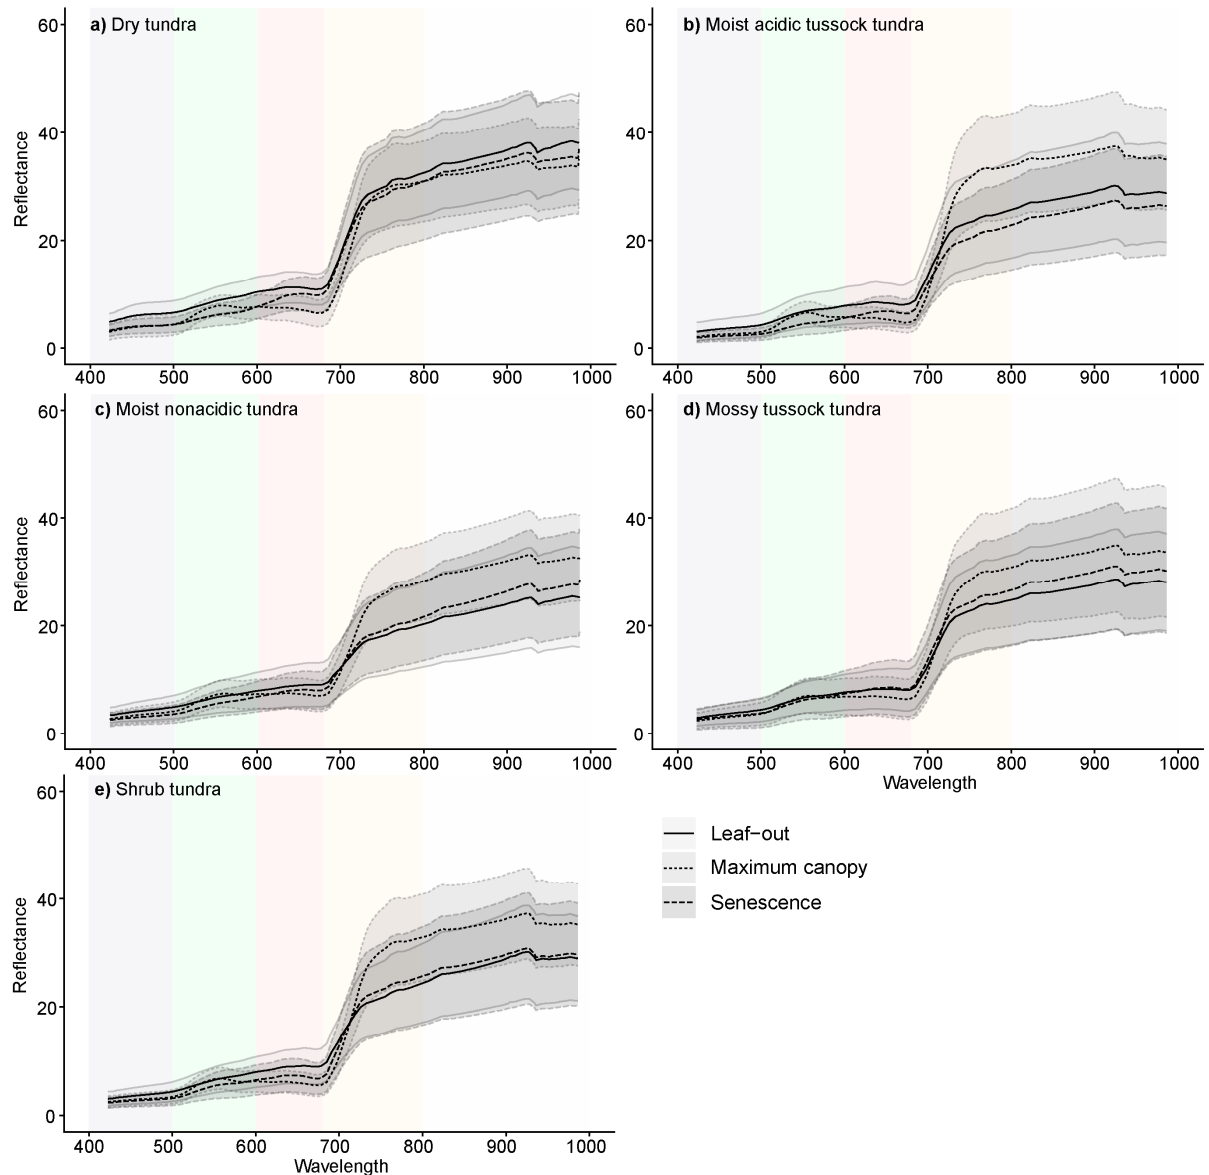

**Figure S1** Mean (black line) and standard deviation (grey ribbon) of simulated EnMAP reflectance spectra of five dominant tundra vegetation communities in three major phenophases of leaf-out, maximum canopy, and senescence. a) dry tundra, b) moist acidic tussock tundra, c) moist nonacidic tundra, d) mossy tussock tundra, e) shrub tundra.

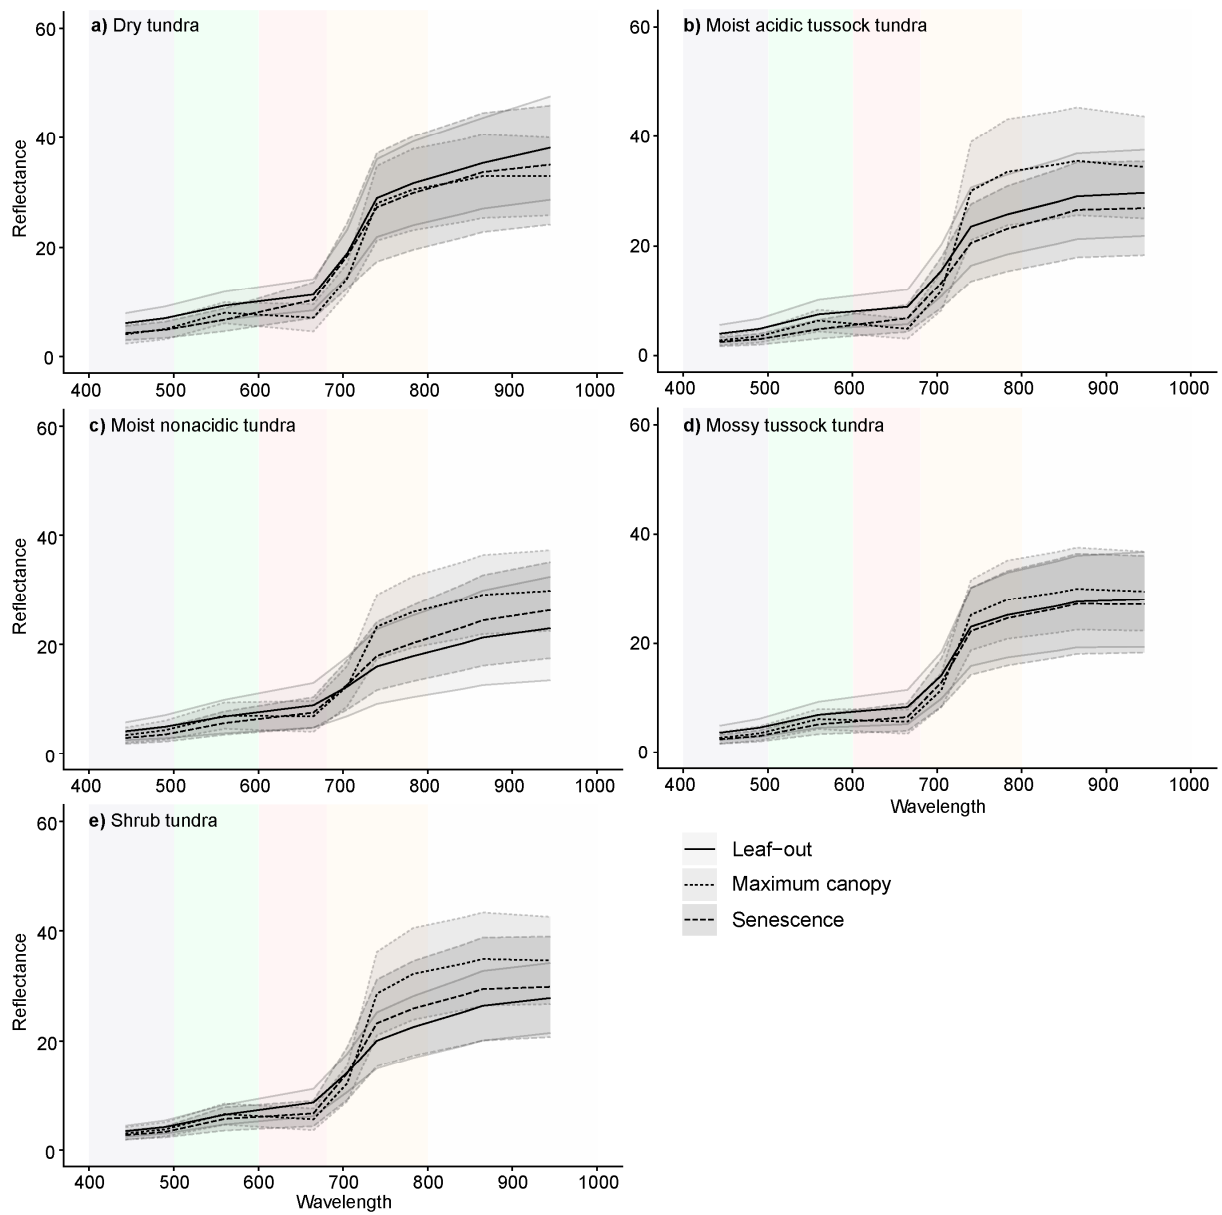

**Figure S2** Mean (black line) and standard deviation (grey ribbon) of simulated Sentinel-2 reflectance spectra of five dominant tundra vegetation communities in three major phenophases of leaf-out, maximum canopy, and senescence. a) dry tundra, b) moist acidic tussock tundra, c) moist nonacidic tundra, d) mossy tussock tundra, e) shrub tundra.
